# Supplementary material for: Responses on Must and Wine Composition of Vitis vinifera L. cvs. Riesling and Cabernet Sauvignon under a Free Air CO2 Enrichment (FACE)
Source: PubMed Central journal article supplement (PMC7828110; doi:10.3390/foods10010145), 2021-01-12
Supplement: foods-10-00145-s001.pdf [file foods-10-00145-s001.pdf]

## Supplementary Material:

# Responses on must and wine composition of *Vitis vinifera* L. cvs. Riesling and Cabernet Sauvignon under a Free Air CO<sub>2</sub> Enrichment (FACE)

Yvette Wohlfahrt <sup>1,\*</sup>, Claus-Dieter Patz <sup>2</sup>, Dominik Schmidt <sup>3</sup>, Doris Rauhut <sup>4</sup>, Bernd Honermeier <sup>5</sup>, Manfred Stoll <sup>1</sup>

<sup>1</sup>Hochschule Geisenheim University, Department of General and Organic Viticulture, 65366 Geisenheim, Germany

<sup>2</sup>Hochschule Geisenheim University, Department of Beverage Research, 65366 Geisenheim, Germany

<sup>3</sup>Hochschule Geisenheim University, Department of Modeling and Systems Analysis, 65366 Geisenheim, Germany

<sup>4</sup>Hochschule Geisenheim University, Department of Microbiology and Biochemistry, 65366 Geisenheim, Germany

<sup>5</sup>Justus Liebig University, Institute of Agronomy and Plant Breeding I, 35392 Giessen, Germany

\* Corresponding author

E-mail: yvette.wohlfahrt@hs-gm.de; Phone: +49 6722 144

### ORCID

Yvette Wohlfahrt: 0000-0002-2496-781X

Claus-Dieter Patz: 0000-0002-7080-1917

Dominik Schmidt: 0000-0001-9480-2001

Bernd Honermeier: 0000-0003-4709-2136

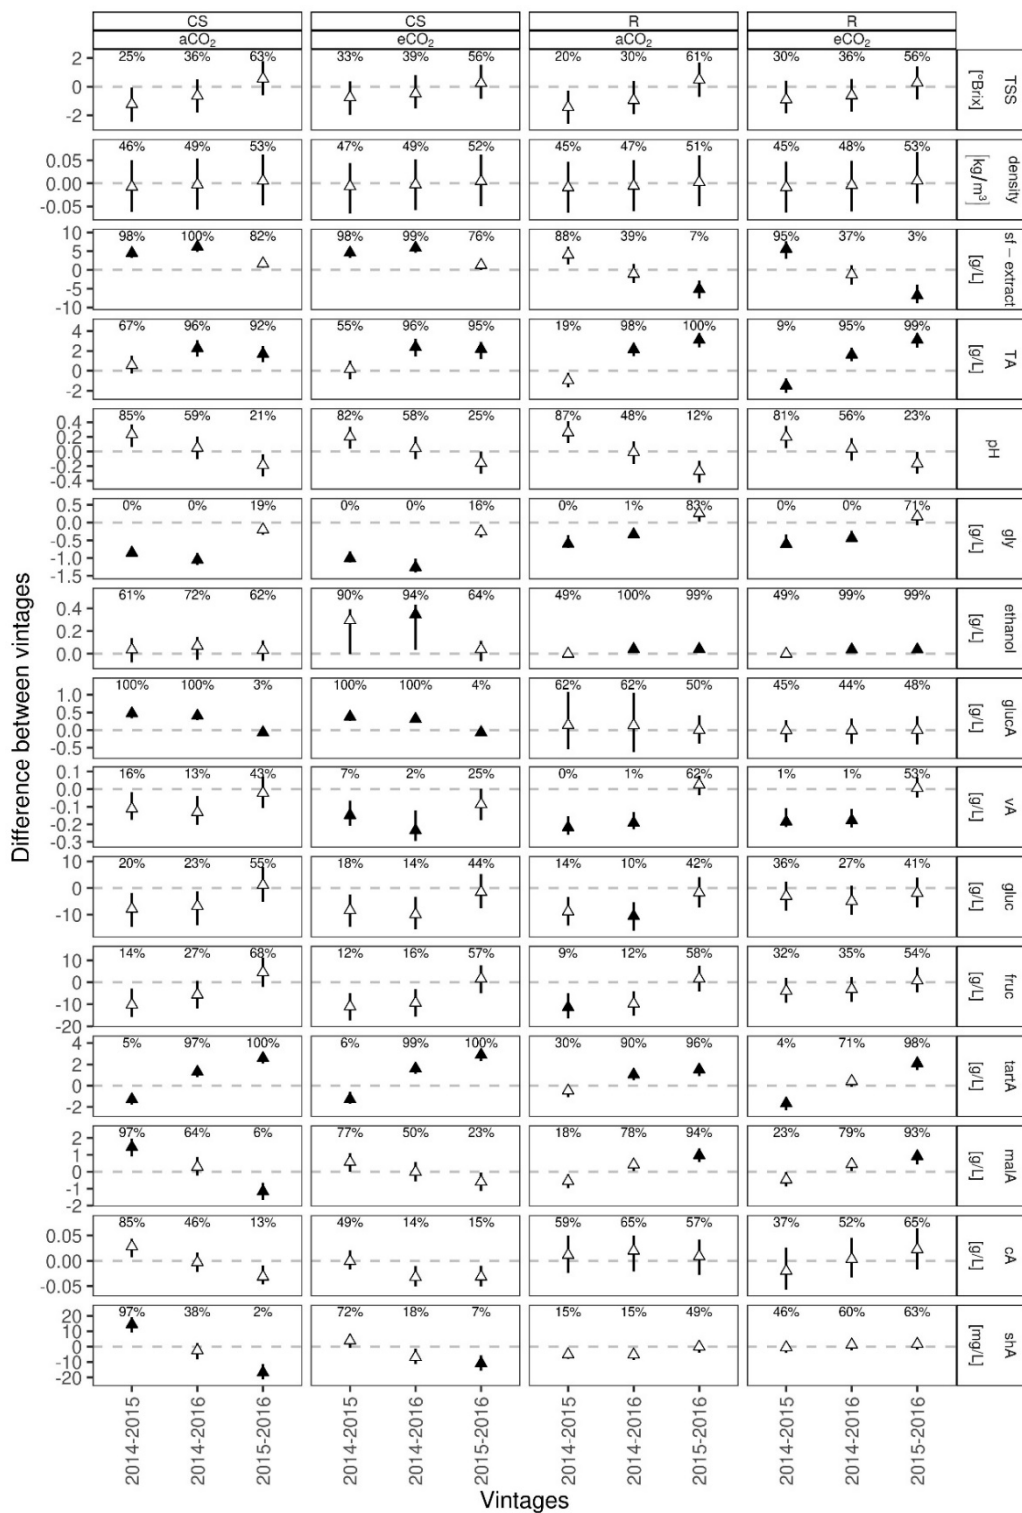

**Figure S1.** Posterior predicted difference (median and 50% HDI) between vintages within treatment ( $eCO_2$  and  $aCO_2$ ) from Bayesian generalized linear mixed effects models on analyzed must parameters of Cabernet Sauvignon (CS) and Riesling (R). Percentages represent the probability of  $Vintage1 - Vintage2 > 0$ . Filled symbols indicate “significant differences”, if the probability is  $>90\%$  (positive difference) or  $<10\%$  (negative difference).

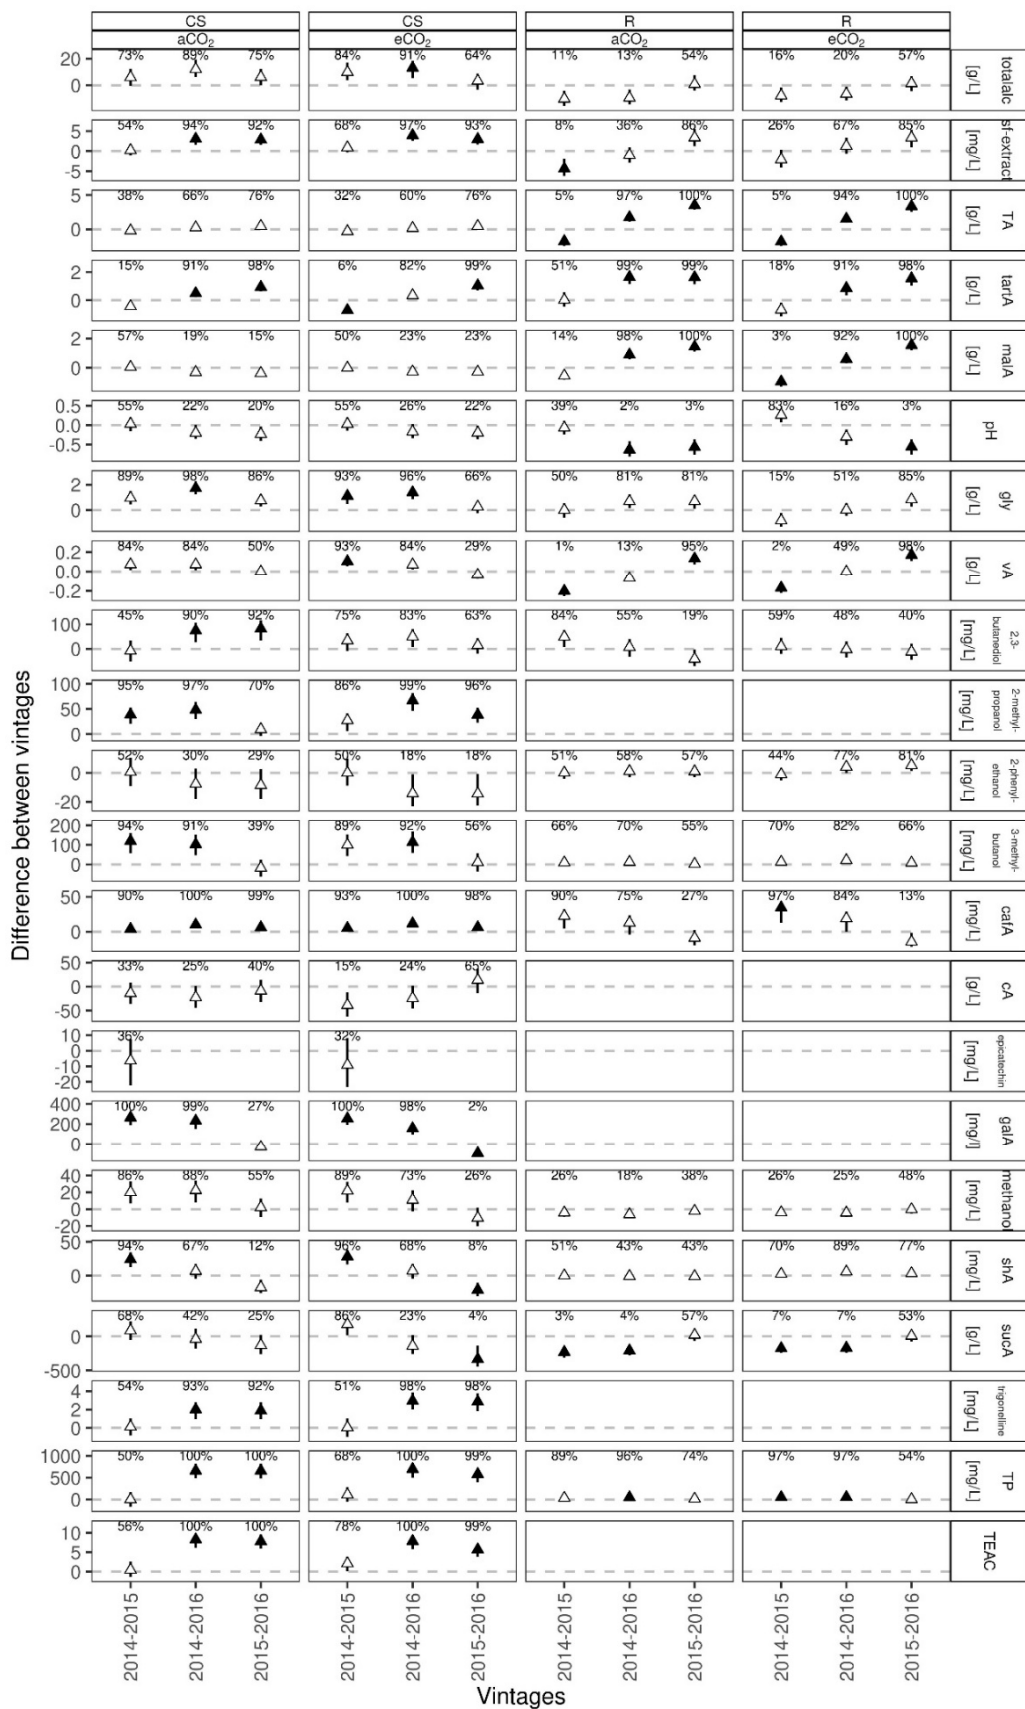

**Figure S2.** Posterior predicted difference (median and 50% HDI) between vintages within treatment (eCO<sub>2</sub> and aCO<sub>2</sub>) from Bayesian generalized linear mixed effects models on analyzed wine parameters of Cabernet Sauvignon (CS) and Riesling (R). Percentages represent the probability of Vintage1-Vintage2 > 0. Filled symbols indicate “significant differences”, if the probability is >90% (positive difference) or <10% (negative difference).

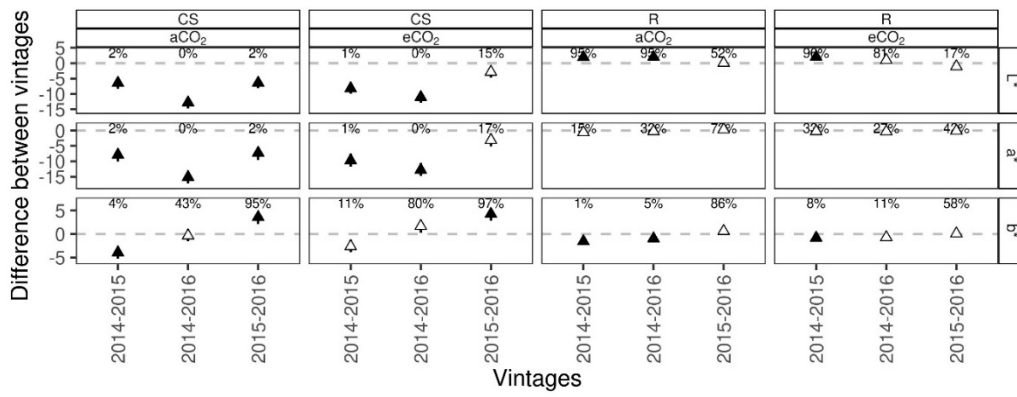

**Figure S3.** Posterior predicted difference (median and 50% HDI) between vintages within treatment (eCO<sub>2</sub> and aCO<sub>2</sub>) from Bayesian generalized linear mixed effects models on L\*, A\* and b\* calculations of Cabernet Sauvignon (CS) and Riesling (R). Percentages represent the probability of Vintage1-Vintage2 > 0. Filled symbols indicate “significant differences”, if the probability is >90% (positive difference) or <10% (negative difference).

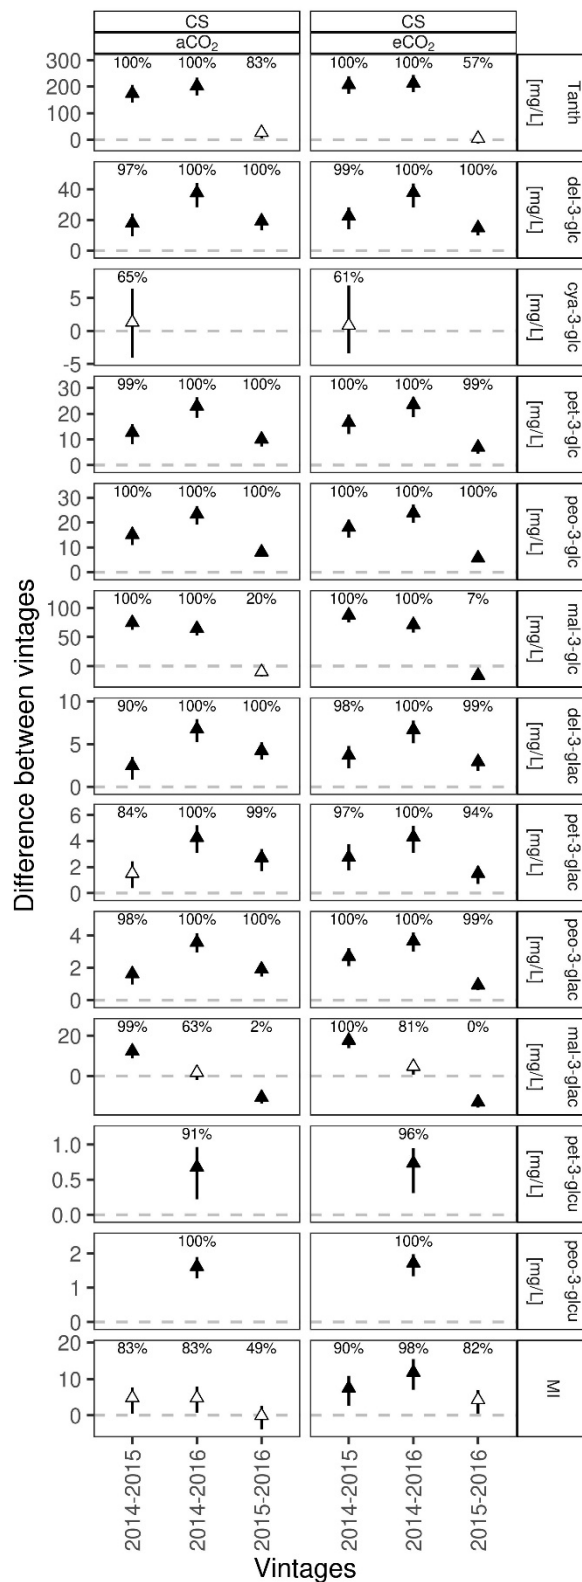

**Figure S4.** Posterior predicted difference (median and 50% HDI) between vintages within treatment (eCO<sub>2</sub> and aCO<sub>2</sub>) from Bayesian generalized linear mixed effects models on anthocyanins and monomeric index of Cabernet Sauvignon (CS). Percentages represent the probability of Vintage1-Vintage2 > 0. Filled symbols indicate “significant differences”, if the probability is >90% (positive difference) or <10% (negative difference).
